# Supplementary material for: Dual-enzyme and NADPH co-embedded organic–inorganic hybrid nanoflowers prepared using biomimetic mineralization for the asymmetric synthesis of (R)-(−)-pantolactone
Source: Royal Society of Chemistry journal article supplement (doi:10.1039/d0re00158a), 2020-01-01
Supplement: d0re00158a1.pdf [file d0re00158a1.pdf]

**Supplementary material**

**Dual-enzyme and NADPH co-embedded organic-inorganic hybrid nanoflowers prepared using biomimetic mineralization for the asymmetric synthesis of (*R*)-(-)-pantolactone**

**Author names and affiliations**

Pengfei Cheng,<sup>a</sup> Manman Tang,<sup>b</sup> Zhiji Chen,<sup>b</sup> Wen Liu<sup>b</sup>, Xinpeng Jiang,<sup>a</sup> Xiaolin Pei,<sup>\*,a,b</sup> Weike Su<sup>\*,a</sup>

<sup>a</sup> Collaborative Innovation Center of Yangtze River Delta Region Green Pharmaceuticals, College of pharmacy, Zhejiang University of Technology, Hangzhou, 310032, PR China

<sup>b</sup> College of Material, Chemistry and Chemical Engineering, Hangzhou Normal University, Hangzhou, 310012, PR China

**\*Corresponding author at:** Collaborative Innovation Center of Yangtze River Delta Region Green Pharmaceuticals, Zhejiang University of Technology, Hangzhou, PR China.

**\*\*Corresponding author at:** College of Material, Chemistry and Chemical Engineering, Hangzhou Normal University, Hangzhou, PR China.

**E-mail addresses:** [suweike@zjut.edu.cn](mailto:suweike@zjut.edu.cn) (W. Su); [pxl@hznu.edu.cn](mailto:pxl@hznu.edu.cn) (X. Pei)

**Table S1** Plasmids used in this study

| Plasmid                  | Relevant genotype or characteristic                                                                                                                                                 | Reference or source  |
|--------------------------|-------------------------------------------------------------------------------------------------------------------------------------------------------------------------------------|----------------------|
| pET28a (+)               | P <sub>T7lac</sub> , Ori (ColE1), Kan <sup>R</sup>                                                                                                                                  | Novagen <sup>a</sup> |
| pET21a (+)               | P <sub>T7lac</sub> , Ori (ColE1), Amp <sup>R</sup>                                                                                                                                  | Novagen              |
| pET28a-<br><i>CduCPR</i> | Expression vector, pET28a(+) derivative,<br>Kan <sup>R</sup> , containing the conjugated<br>polyketone reductase gene from <i>C.</i><br><i>dublinsiensis</i> CD36 ( <i>CduCPR</i> ) | Cheng et al., 2019   |
| pETgGDH                  | Expression vector, pET21a(+) derivative,<br>Amp <sup>R</sup> , containing the glucose<br>dehydrogenase gene from <i>Themoproteus</i><br><i>sp.</i> GDH-1 (TgGDH)                    | Aiba et al., 2015    |

<sup>a</sup> Merck KGaA, Darmstadt, Germany.

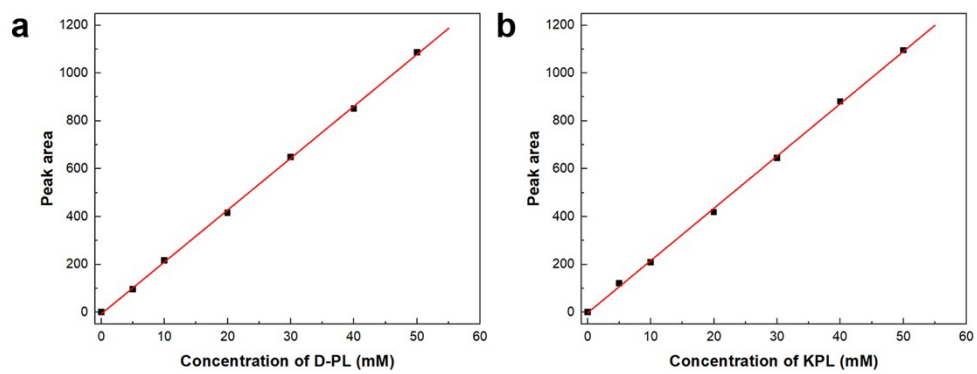

**Fig. S1.** The standard curves of (*R*)-PL (a) and KPL (b) by GC (external standard method).

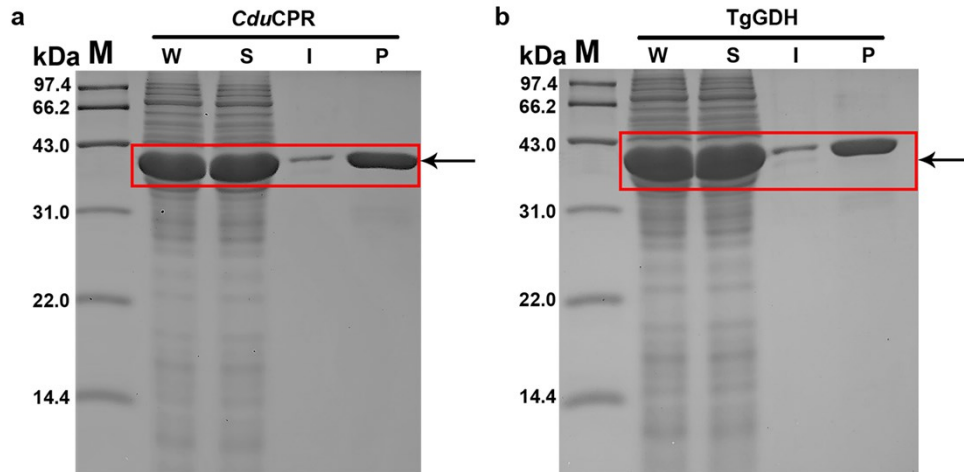

**Fig. S2** The expression of *CduCPR* and *TgGDH* in *E. coli* BL21 (DE3) analyzed by SDS-PAGE. M: protein markers; W: whole cell proteins; S: soluble part; I: insoluble part of whole cell protein and P: purified protein.

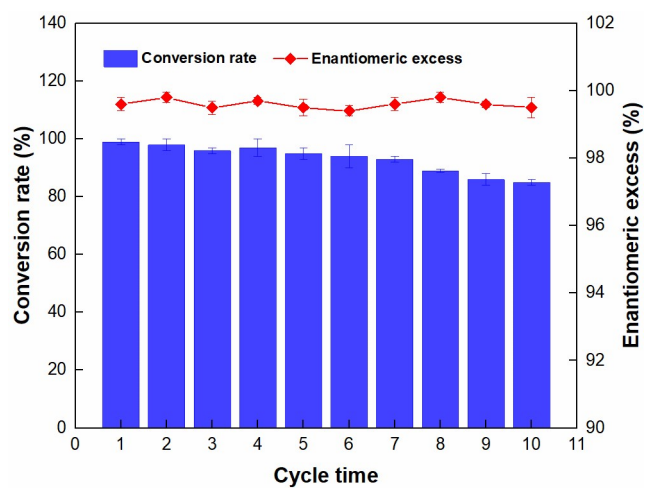

**Fig. S3** Reusability of SA-NADP<sup>+</sup> in the dual-enzymatic synthesis of (*R*)-pantolactone.

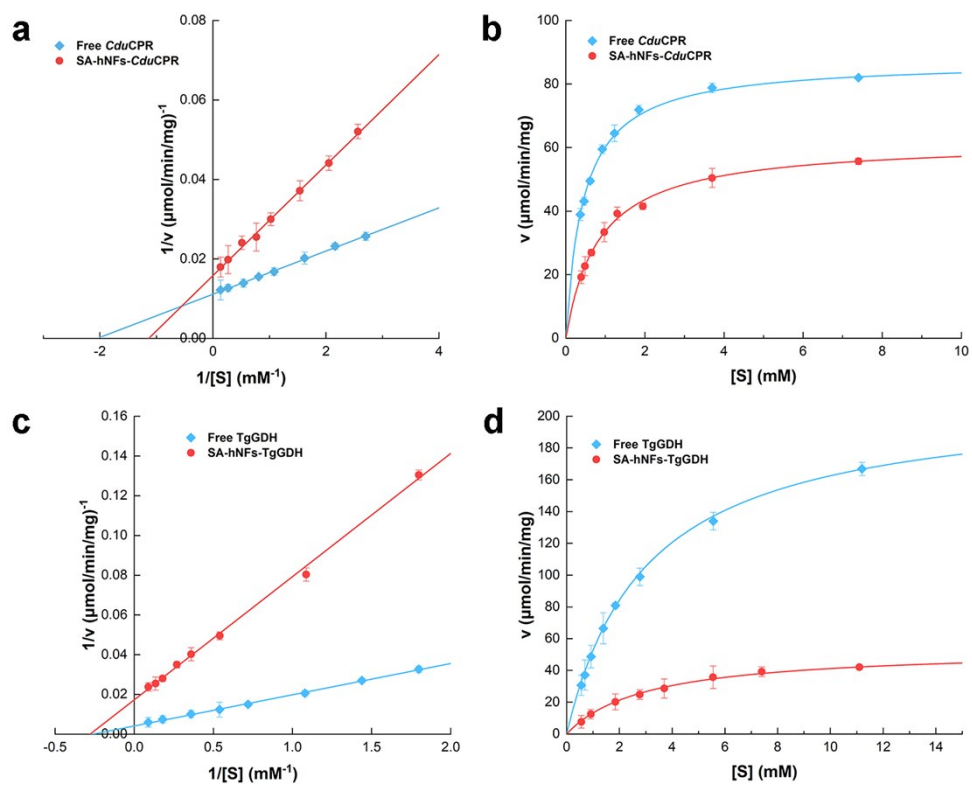

**Fig. S4** Lineweaver-Burk Plots and substrate saturation plots for ketopantoyl lactone of *CduCPR/TgGDH@Ca<sub>3</sub>(PO<sub>4</sub>)<sub>2</sub>* hybrid composites with or without the SA coated.

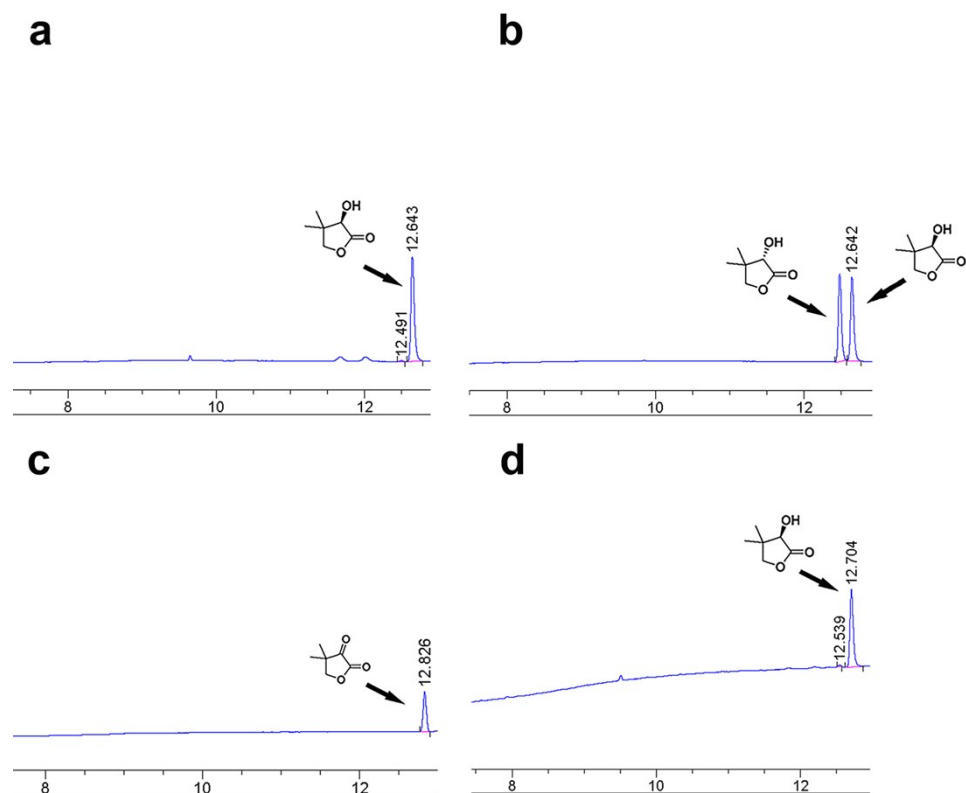

**Fig. S5** GC analysis of biotransformation reaction. (a) *(R)*-PL reference standard; (b) *(RS)*-PL reference standard; (c) Ketopantoyl lactone reference standard; (d) The product with the SA-coated *CduCPR*/*TgGDH*@ $\text{Ca}_3(\text{PO}_4)_2$ .

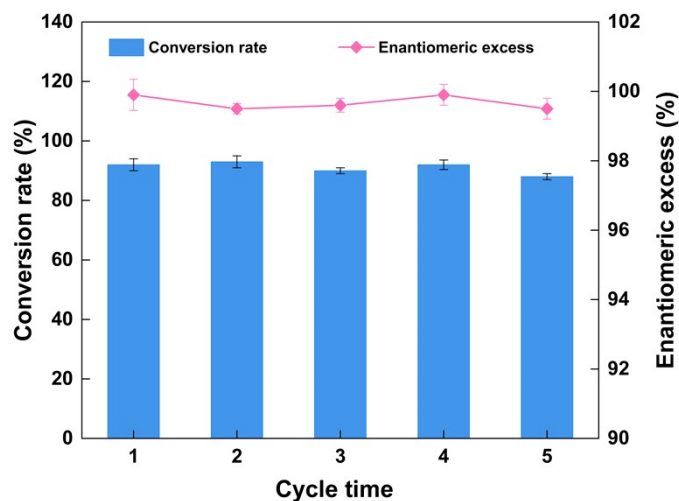

**Fig. S6** Catalytic efficiency of mixed two different particles containing *CduCPR* and *TgGDH* respectively.

The catalytic efficiency of mixed two different particles was performed under the optimum reaction condition. A total of 4 mL 100 mM potassium phosphate buffer (pH 7.0) contained 75 mM glucose, two different particles (containing 5 mg/mL of *TgGDH*, 1 mg/mL of *CduCPR*) and 2.5 mg/mL SA-NADP<sup>+</sup>. The substrate stock solution was prepared by dissolving 32 mg KPL in 1 mL acetic acid/sodium acetate (50 mM, pH 2.6). The stock solution of KPL was pumped into the reactor at 25  $\mu$ L/min. The reaction pH was maintained at pH 7.0 by titration with 2 M Na<sub>2</sub>CO<sub>3</sub>. After the feeding was finished, the reaction was stirred at 30 °C for another 20 min. The concentration of (*R*)-PL and KPL in the reaction supernatant was determined by gas chromatography.



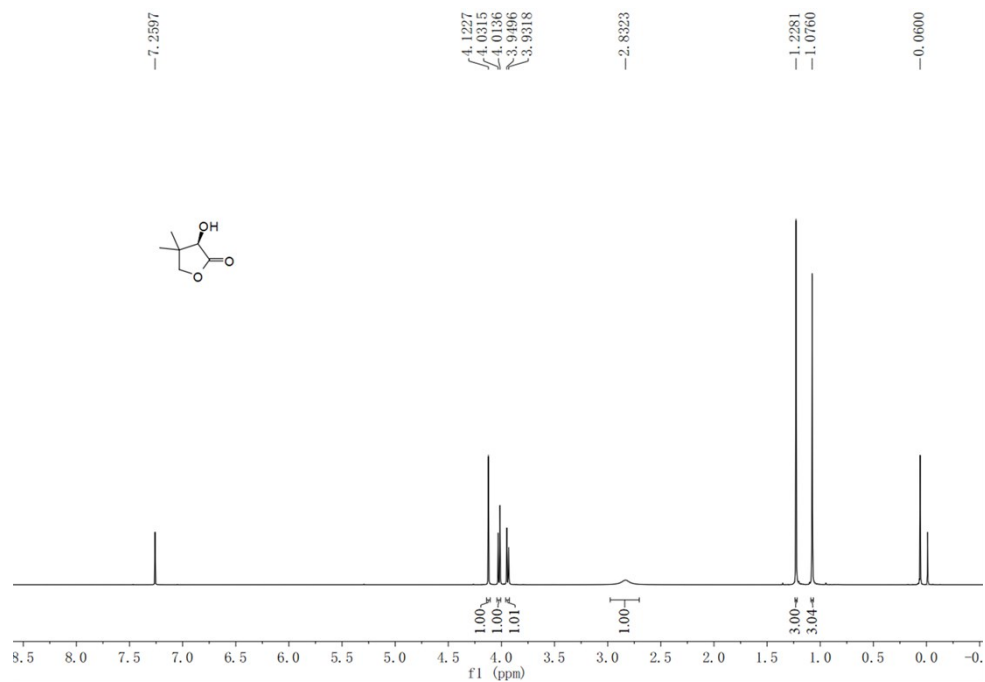

**Fig. S7** <sup>1</sup>H NMR spectrum of the purified product (*R*)-PL catalyzed using SA- NADP<sup>+</sup> *CduCPR/TgGDH@Ca<sub>3</sub>(PO<sub>4</sub>)<sub>2</sub>*. <sup>1</sup>H NMR (500 MHz, CDCl<sub>3</sub>) δ 4.12 (s, 1H), 4.02 (d, *J* = 8.9 Hz, 1H), 3.94 (d, *J* = 8.9 Hz, 1H), 2.83 (s, 1H), 1.23 (s, 3H), 1.08 (s, 3H).

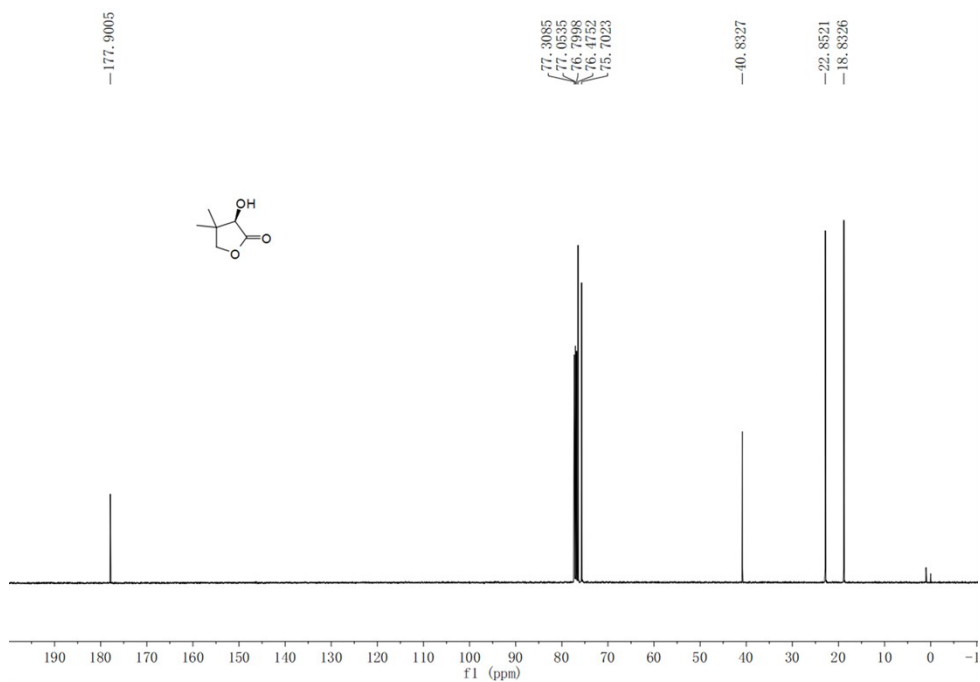

**Fig. S8** <sup>13</sup>C NMR spectrum of the purified product (*R*)-PL catalyzed using SA- NADP<sup>+</sup> *CduCPR/TgGDH@Ca<sub>3</sub>(PO<sub>4</sub>)<sub>2</sub>*. <sup>13</sup>C NMR (125 MHz, CDCl<sub>3</sub>) δ 177.90 (s), 76.48 (s), 75.70 (s), 40.83 (s), 22.85 (s), 18.83 (s).
